# Supplementary material for: Toward Graph Data Collaboration in a Data-Sharing-Free Manner: A Novel Privacy-Preserving Graph Pretraining Model
Source: Atypon-hosted journal article supplement (doi:10.1287/ijoc.2023.0115), 2025-06-04
Supplement: ijoc.2023.0115.cd.zip [file Figure_D1.pdf › 2023.0115-main/results/Figure_D1.pdf]

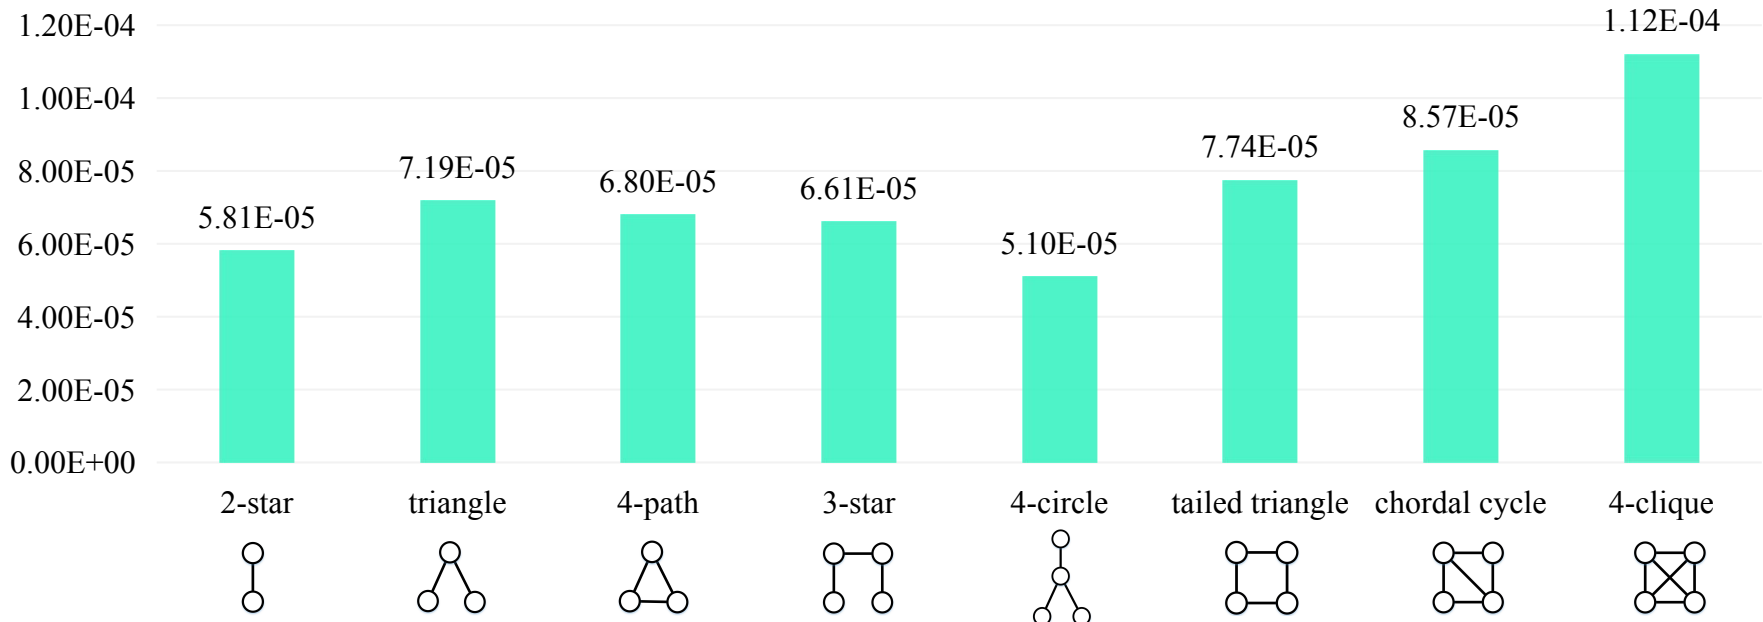

(a) Privacy leakage score of various graph sub-structures

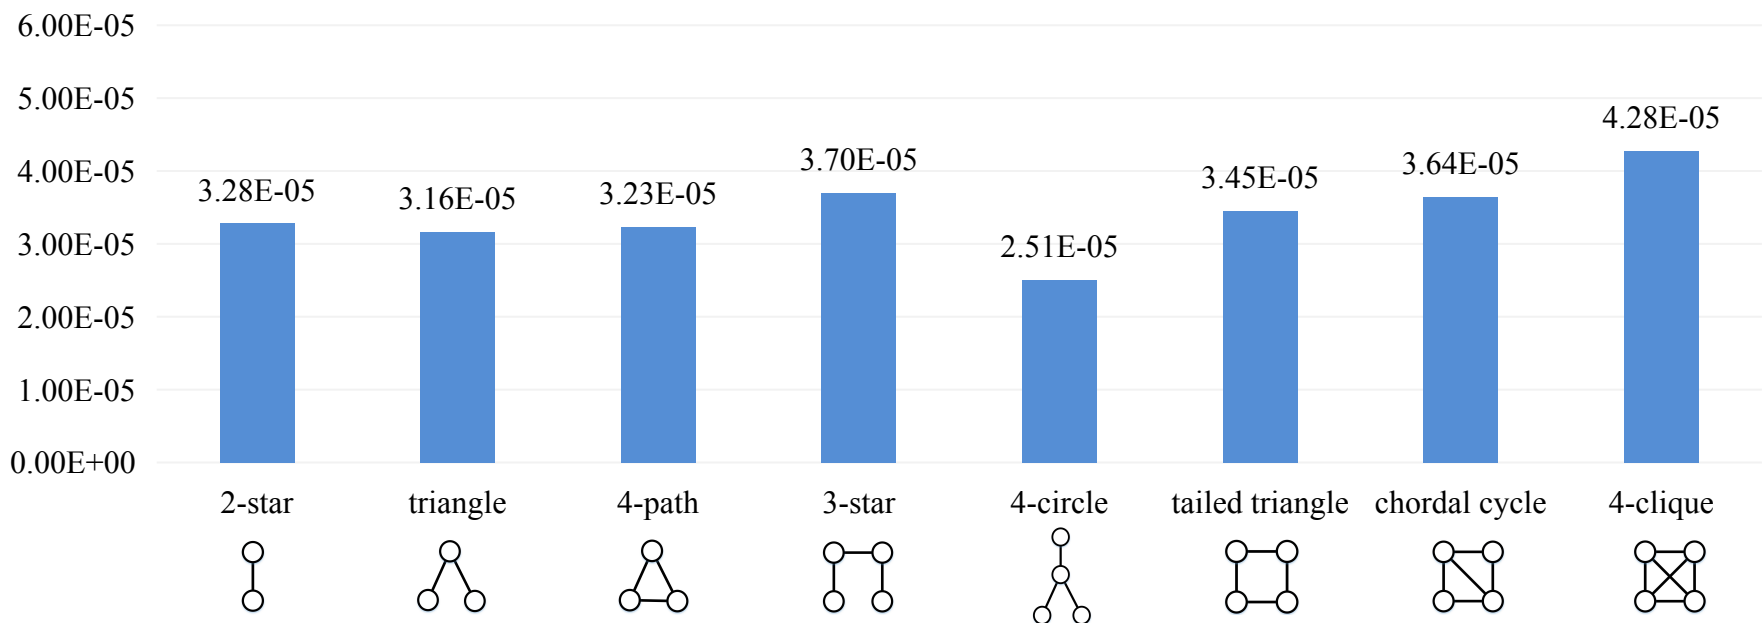

(b) Generalizability score of various graph sub-structures
