# Supplementary material for: Toward Graph Data Collaboration in a Data-Sharing-Free Manner: A Novel Privacy-Preserving Graph Pretraining Model
Source: Atypon-hosted journal article supplement (doi:10.1287/ijoc.2023.0115), 2025-06-04
Supplement: ijoc.2023.0115.cd.zip [file Table_1.pdf › 2023.0115-main/results/Table_1.pdf]

| Table 1      The privacy-preserving performance of private link reconstruction attack, reported as AUC (Std). |                                                                                      |
|---------------------------------------------------------------------------------------------------------------|--------------------------------------------------------------------------------------|
|                                                                                                               | Private link reconstruction attack (AUC%)                                            |
|                                                                                                               | Deezer      Facebook-Page      LastFM      Twitter-Foursquare      Phone-Email       |
| GCC                                                                                                           | 86.19 (0.38)      92.02 (0.21)      88.70 (0.09)      72.28 (0.51)      82.32 (0.23) |
| GAL-W                                                                                                         | 69.29 (0.29)      72.12 (0.08)      74.49 (0.24)      64.24 (0.27)      70.06 (0.64) |
| GAL-TV                                                                                                        | 71.52 (0.25)      75.83 (0.26)      78.28 (0.23)      65.02 (0.31)      71.67 (0.24) |
| EdgeRand                                                                                                      | 83.05 (0.62)      85.29 (0.58)      87.45 (0.40)      69.15 (0.21)      78.90 (0.22) |
| LapGraph                                                                                                      | 83.75 (0.08)      85.90 (0.19)      86.83 (0.30)      69.33 (0.15)      79.47 (0.39) |
| Ours                                                                                                          | 82.35 (0.17)      83.80 (0.15)      83.55 (0.11)      68.82 (0.24)      74.87 (0.37) |
