# Supplementary material for: Toward Graph Data Collaboration in a Data-Sharing-Free Manner: A Novel Privacy-Preserving Graph Pretraining Model
Source: Atypon-hosted journal article supplement (doi:10.1287/ijoc.2023.0115), 2025-06-04
Supplement: ijoc.2023.0115.cd.zip [file Table_2.pdf › 2023.0115-main/results/Table_2.pdf]

**Table 2      The generalizability performance of downstream tasks on node classification and link prediction, reported as Micro F1 (Std).**

|          | Node classification (Micro F1%) |               |              | Link prediction (Micro F1%) |               |              |                    |              |
|----------|---------------------------------|---------------|--------------|-----------------------------|---------------|--------------|--------------------|--------------|
|          | Deezer                          | Facebook-Page | LastFM       | Deezer                      | Facebook-Page | LastFM       | Twitter-Foursquare | Phone-Email  |
| GCC      | 56.14 (0.35)                    | 49.26 (0.14)  | 23.62 (0.35) | 78.24 (0.69)                | 78.85 (0.59)  | 88.30 (0.45) | 82.32 (0.23)       | 87.80 (0.29) |
| GAL-W    | 37.29 (0.16)                    | 40.85 (0.10)  | 11.83 (0.06) | 67.41 (0.53)                | 70.87 (0.64)  | 75.73 (0.51) | 68.75 (0.20)       | 76.36 (0.20) |
| GAL-TV   | 37.53 (0.60)                    | 42.96 (0.06)  | 13.15 (0.37) | 69.59 (0.38)                | 70.92 (0.33)  | 76.91 (0.36) | 69.50 (0.42)       | 77.40 (0.22) |
| EdgeRand | 55.28 (0.31)                    | 48.53 (0.16)  | 23.22 (0.26) | 77.42 (0.29)                | 79.67 (0.61)  | 88.88 (0.69) | 82.53 (0.38)       | 88.05 (0.74) |
| LapGraph | 55.78 (0.38)                    | 49.06 (0.13)  | 22.91 (0.53) | 78.96 (0.51)                | 79.56 (0.75)  | 88.09 (0.25) | 83.10 (0.35)       | 87.34 (0.59) |
| Ours     | 56.05 (0.18)                    | 49.62 (0.19)  | 23.57 (0.30) | 78.77 (0.54)                | 78.05 (0.51)  | 89.30 (0.24) | 83.39 (0.24)       | 88.41 (0.22) |
