# Supplementary material for: Toward Graph Data Collaboration in a Data-Sharing-Free Manner: A Novel Privacy-Preserving Graph Pretraining Model
Source: Atypon-hosted journal article supplement (doi:10.1287/ijoc.2023.0115), 2025-06-04
Supplement: ijoc.2023.0115.cd.zip [file Table_D1.pdf › 2023.0115-main/results/Table_D1.pdf]

| Table D1 | The privacy-preserving performance of private link reconstruction attack, reported as AUC (Std). |                                           |              |              |
|----------|--------------------------------------------------------------------------------------------------|-------------------------------------------|--------------|--------------|
|          | Model                                                                                            | Private link reconstruction attack (AUC%) |              |              |
|          |                                                                                                  | DBLP                                      | Amazon       | Twitter      |
|          | GCC                                                                                              | 75.99 (0.42)                              | 78.73 (0.19) | 72.79 (0.22) |
| -        | GAL-W                                                                                            | 65.67 (0.08)                              | 68.80 (0.43) | 65.17 (0.64) |
|          | GAL-TV                                                                                           | 68.32 (0.17)                              | 71.03 (0.40) | 66.39 (0.61) |
|          | EdgeRand                                                                                         | 73.82 (0.20)                              | 76.32 (0.12) | 71.15 (0.27) |
|          | LapGraph                                                                                         | 72.55 (0.15)                              | 75.56 (0.59) | 70.23 (0.19) |
| -        | Ours                                                                                             | 69.92 (0.19)                              | 72.77 (0.43) | 67.58 (0.29) |
