# Supplementary material for: Toward Graph Data Collaboration in a Data-Sharing-Free Manner: A Novel Privacy-Preserving Graph Pretraining Model
Source: Atypon-hosted journal article supplement (doi:10.1287/ijoc.2023.0115), 2025-06-04
Supplement: ijoc.2023.0115.cd.zip [file Table_D2.pdf › 2023.0115-main/results/Table_D2.pdf]

| Table D2 |                                 | Generalizability performance on node classification and link prediction, reported as Micro F1 (Std). |              |                             |              |              |
|----------|---------------------------------|------------------------------------------------------------------------------------------------------|--------------|-----------------------------|--------------|--------------|
| Model    | Node classification (Micro F1%) |                                                                                                      |              | Link prediction (Micro F1%) |              |              |
|          | DBLP                            | Amazon                                                                                               | Twitter      | DBLP                        | Amazon       | Twitter      |
| GCC      | 25.84 (0.20)                    | 40.76 (0.29)                                                                                         | 66.01 (0.31) | 87.37 (0.26)                | 85.89 (0.44) | 74.53 (0.41) |
| GAL-W    | 14.16 (0.09)                    | 33.37 (0.28)                                                                                         | 55.87 (0.47) | 73.78 (0.48)                | 70.77 (0.27) | 64.72 (0.26) |
| GAL-TV   | 16.84 (0.39)                    | 36.28 (0.12)                                                                                         | 57.21 (0.63) | 74.41 (0.35)                | 73.15 (0.74) | 64.11 (0.25) |
| EdgeRand | 24.57 (0.31)                    | 40.52 (0.41)                                                                                         | 64.54 (0.46) | 86.88 (0.69)                | 86.09 (0.55) | 74.37 (0.44) |
| LapGraph | 25.06 (0.64)                    | 39.86 (0.50)                                                                                         | 64.30 (0.40) | 87.18 (0.85)                | 86.82 (0.56) | 75.02 (0.73) |
| Ours     | 25.93 (0.40)                    | 40.98 (0.31)                                                                                         | 65.37 (0.15) | 87.43 (0.41)                | 87.21 (0.41) | 75.40 (0.30) |
