# Supplementary material for: Toward Graph Data Collaboration in a Data-Sharing-Free Manner: A Novel Privacy-Preserving Graph Pretraining Model
Source: Atypon-hosted journal article supplement (doi:10.1287/ijoc.2023.0115), 2025-06-04
Supplement: ijoc.2023.0115.cd.zip [file Table_D3.pdf › 2023.0115-main/results/Table_D3.pdf]

**Table D3 Ablation studies.**

| Model                           | Private link reconstruction attack (AUC%) ↓ |               |        |       |        |         | Downstream performance on node classification (Micro F1%) ↑ |               |        |       |        |         |
|---------------------------------|---------------------------------------------|---------------|--------|-------|--------|---------|-------------------------------------------------------------|---------------|--------|-------|--------|---------|
|                                 | Deezer                                      | Facebook-Page | LastFM | DBLP  | Amazon | Twitter | Deezer                                                      | Facebook-Page | LastFM | DBLP  | Amazon | Twitter |
| Ours                            | 82.35                                       | 83.80         | 83.55  | 69.92 | 72.77  | 67.58   | 56.05                                                       | 49.62         | 23.57  | 25.93 | 40.98  | 65.37   |
| Ours w/o $p_{xy}^{\text{keep}}$ | 79.37                                       | 81.29         | 80.39  | 66.73 | 69.84  | 66.02   | 53.39                                                       | 47.95         | 20.89  | 23.75 | 39.28  | 63.29   |
| Ours w/o $p_{xy}^{\text{del}}$  | 86.79                                       | 86.26         | 89.47  | 76.92 | 79.15  | 73.95   | 56.74                                                       | 49.98         | 23.69  | 26.35 | 41.26  | 65.98   |
| Ours w/o $p(\cdot)$             | 87.95                                       | 87.70         | 88.82  | 77.49 | 80.41  | 74.38   | 57.32                                                       | 50.25         | 23.62  | 26.08 | 41.54  | 66.15   |
| Ours w/o general                | 82.04                                       | 83.46         | 84.04  | 70.33 | 72.54  | 68.29   | 55.40                                                       | 48.90         | 23.45  | 25.29 | 40.72  | 65.12   |
