# Supplementary material for: Toward Graph Data Collaboration in a Data-Sharing-Free Manner: A Novel Privacy-Preserving Graph Pretraining Model
Source: Atypon-hosted journal article supplement (doi:10.1287/ijoc.2023.0115), 2025-06-04
Supplement: ijoc.2023.0115.cd.zip [file Table_D4.pdf › 2023.0115-main/results/Table_D4.pdf]

**Table D4      The effect of graph properties on privacy leakage risk.**

| Dataset       | $ V_{\text{train}} $ | $ E_{\text{train}} $ | average degree | degree variance | graph density | network entropy | clustering coefficient | transitivity | network constraint | scale-free exponent | degree centrality | eigenvector centrality | privacy protection |
|---------------|----------------------|----------------------|----------------|-----------------|---------------|-----------------|------------------------|--------------|--------------------|---------------------|-------------------|------------------------|--------------------|
| Deezer        | 28281                | 214308               | 6.56           | 63.14           | 5.36E-04      | 3.99            | 0.1412                 | 0.09592      | 0.41998            | 5.03                | 2.32E-04          | 1.17E-03               | <b>4.5%</b>        |
| Facebook-Page | 22470                | 364358               | 15.22          | 697.69          | 1.44E-03      | 5.13            | 0.3597                 | 0.23232      | 0.31780            | 3.24                | 6.77E-04          | 1.32E-03               | <b>8.9%</b>        |
| LastFM        | 7624                 | 63196                | 7.29           | 132.23          | 2.18E-03      | 4.03            | 0.2194                 | 0.17862      | 0.44297            | 3.33                | 9.57E-04          | 2.00E-03               | <b>5.8%</b>        |

*Notes:* We report the average value of some node-level properties including network constraint, degree centrality and eigenvector centrality.
