# Supplementary figures and images for: Toward Graph Data Collaboration in a Data-Sharing-Free Manner: A Novel Privacy-Preserving Graph Pretraining Model
Source: Atypon-hosted journal article supplement (doi:10.1287/ijoc.2023.0115), 2025-06-04

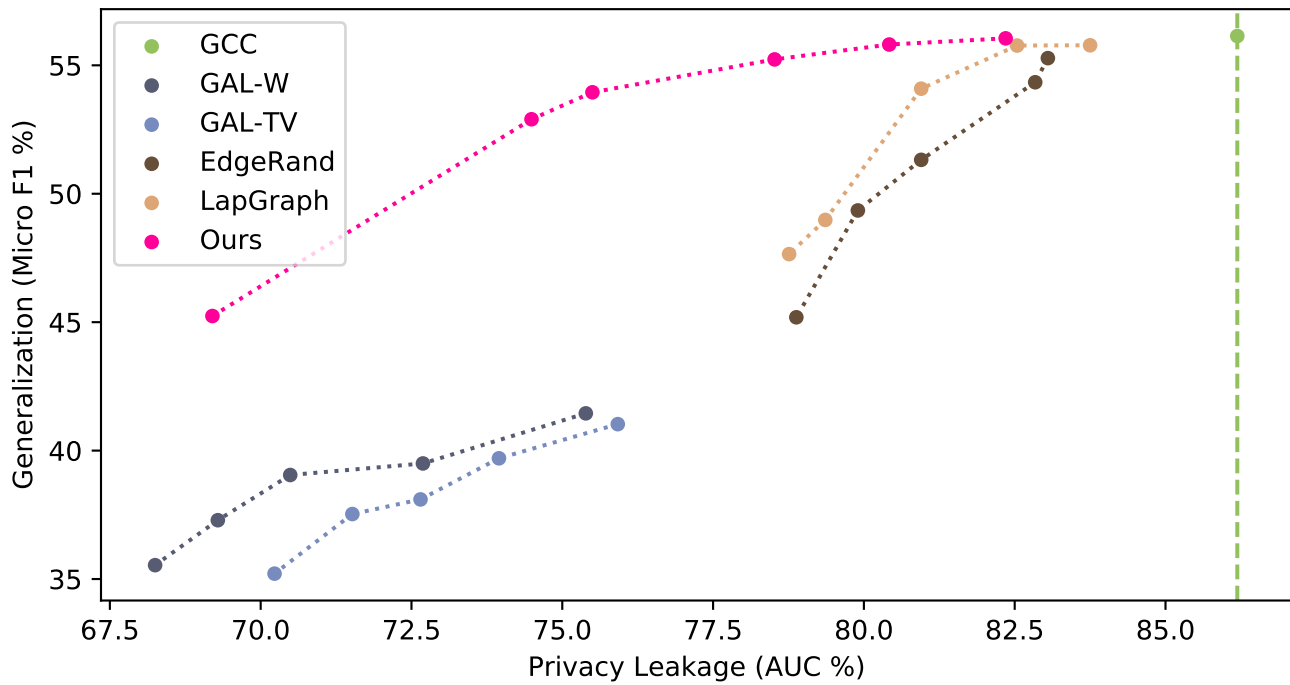

Supplement: ijoc.2023.0115.cd.zip [file Figure_5.pdf › 2023.0115-main/results/Figure_5.pdf]

network constraint

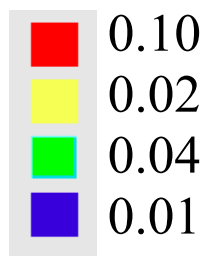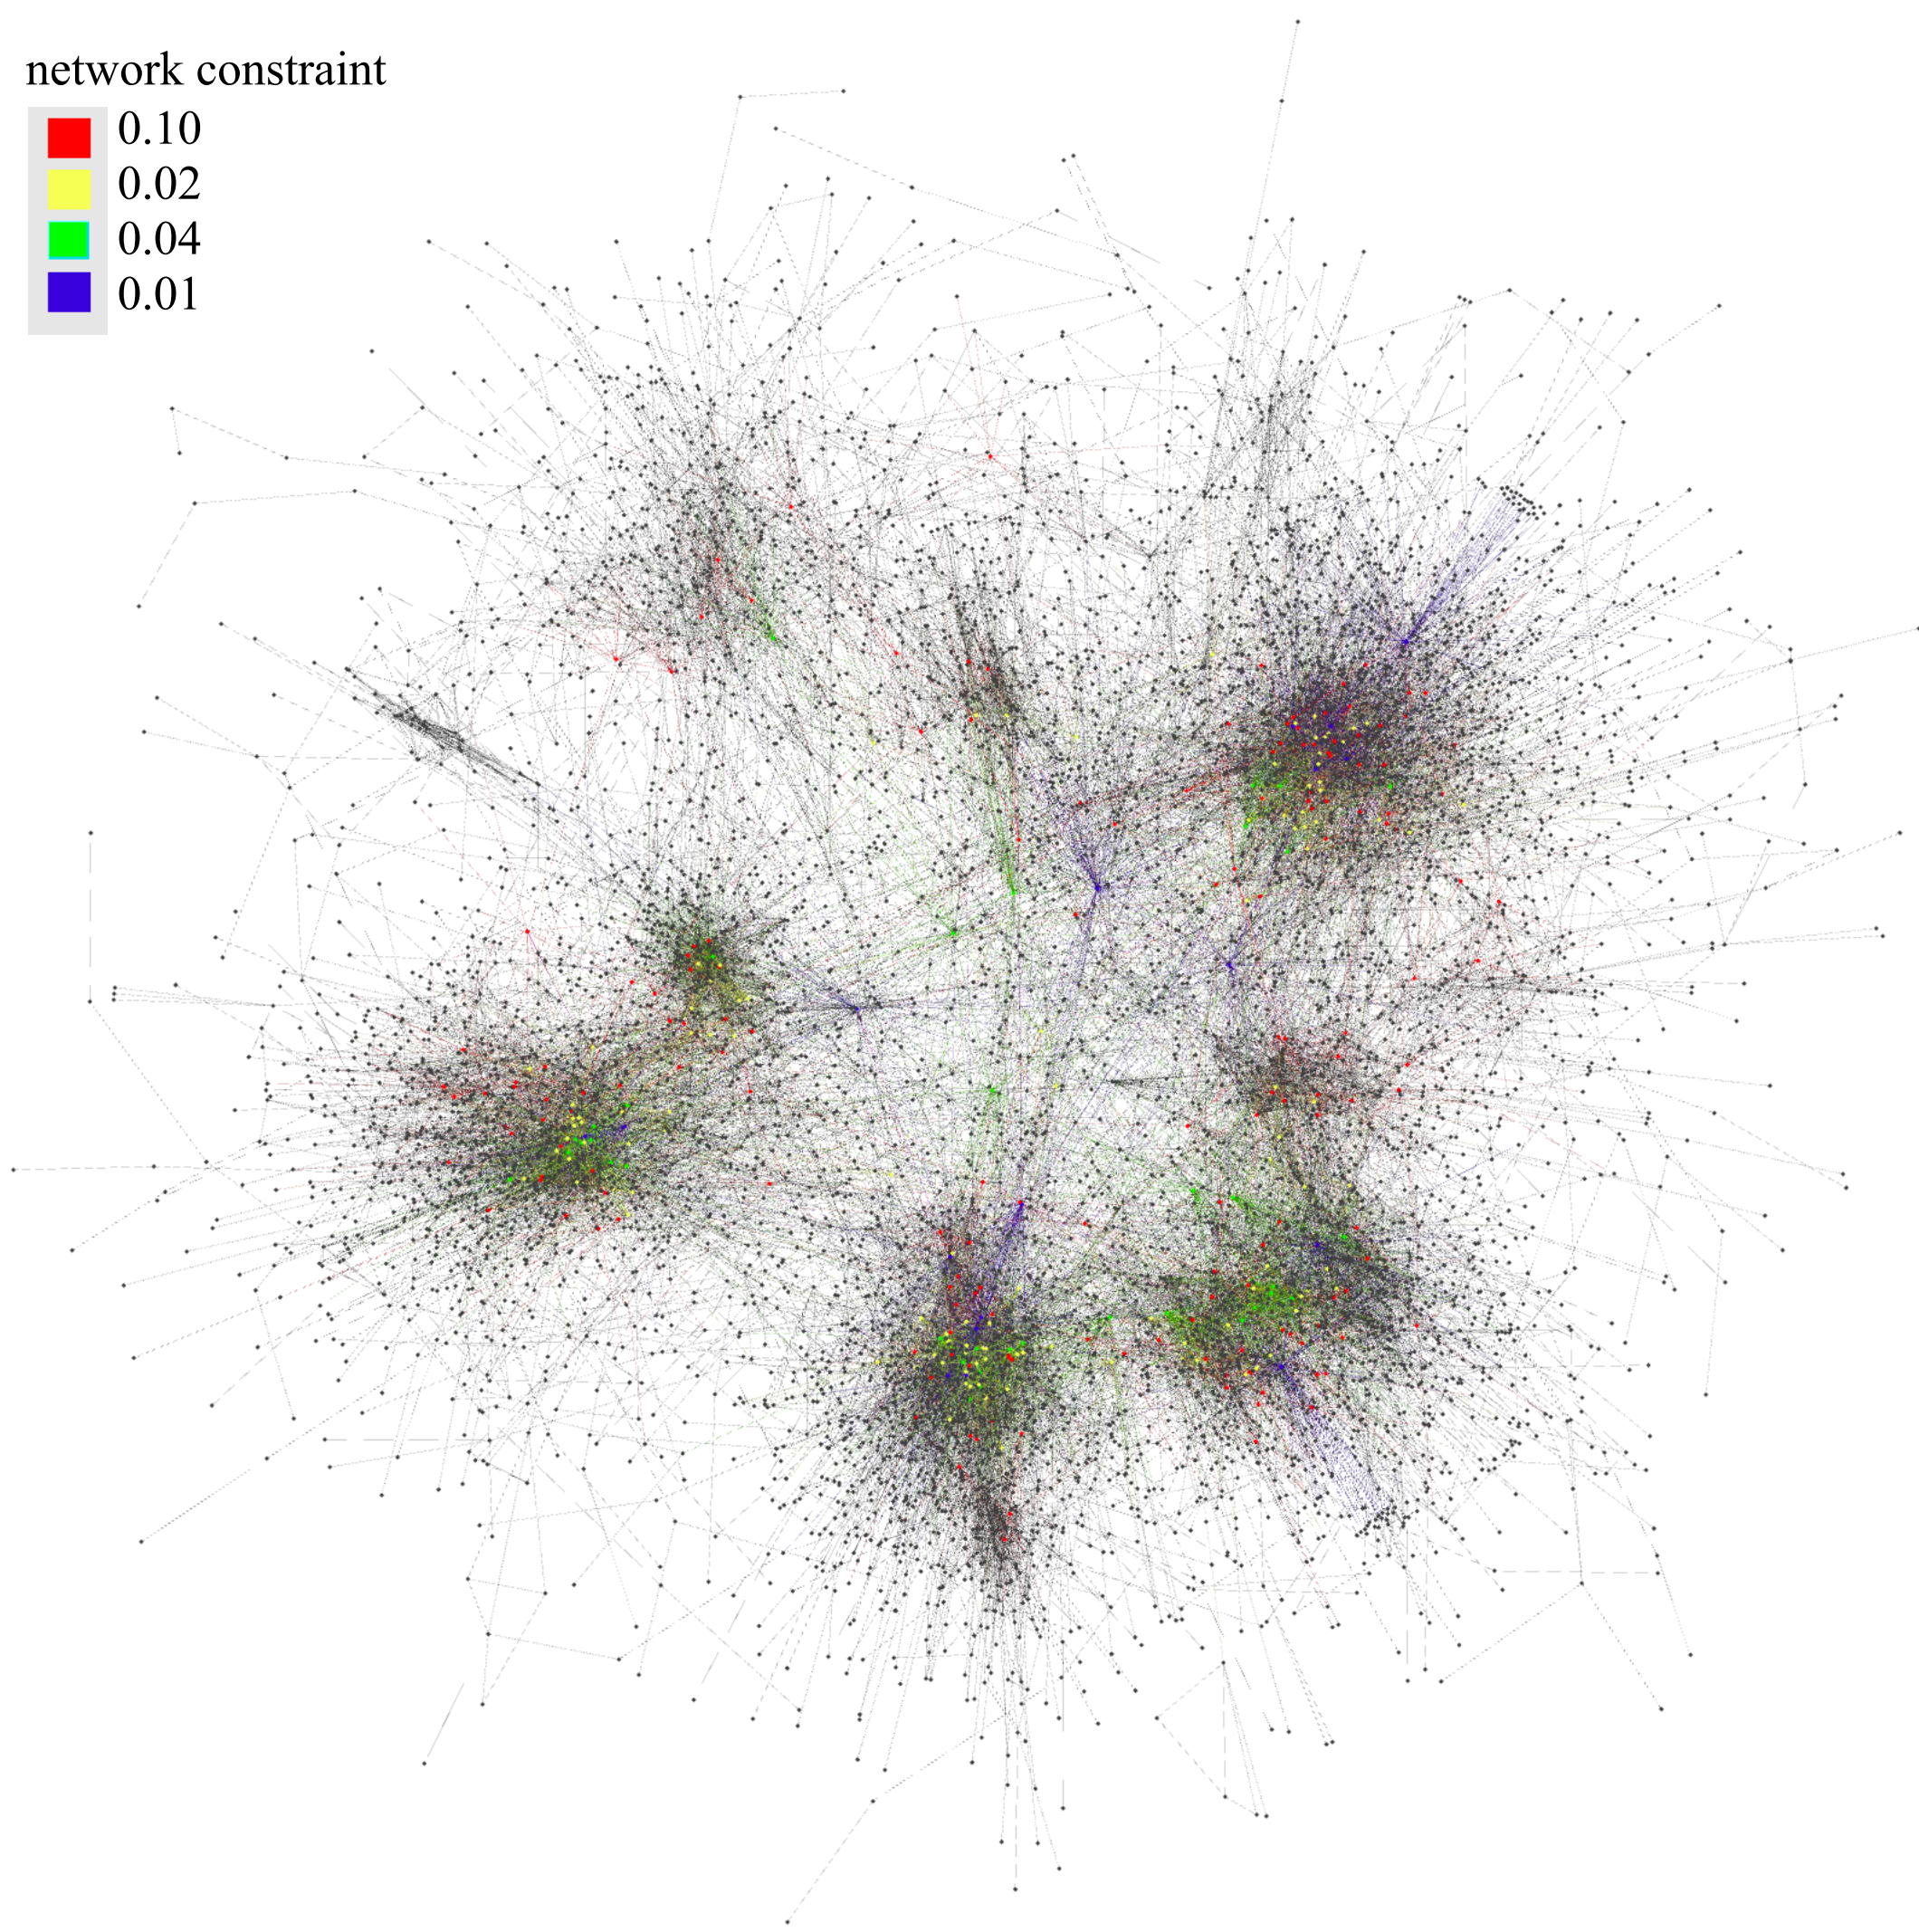

Supplement: ijoc.2023.0115.cd.zip [file Figure_D2_right.pdf › 2023.0115-main/results/Figure_D2_right.pdf]
